# Supplementary material for: High voltage and superior cyclability of indium hexacyanoferrate cathodes for aqueous Na-ion batteries enabled by superconcentrated NaClO4 electrolytes
Source: Royal Society of Chemistry journal article supplement (doi:10.1039/d2ya00130f), 2022-01-01
Supplement: d2ya00130f1.pdf [file d2ya00130f1.pdf]

## Supporting Information

### High Voltage and Superior Cyclability of Indium Hexacyanoferrate Cathodes for Aqueous Na-ion Batteries Enabled by Superconcentrated NaClO<sub>4</sub> Electrolytes

*Xaver Lamprecht,<sup>a,b,(1)</sup> Philipp Marzak,<sup>a,b,(1)</sup> Alexander Wiczorek,<sup>a</sup> Nina Thomsen,<sup>a</sup> Jongho Kim,<sup>a</sup> Batyr Garlyyev,<sup>a</sup> Yunchang Liang,<sup>c,d</sup> Aliaksandr S. Bandarenka,<sup>a,b,\*</sup> Jeongsik Yun,<sup>a,b,\*</sup>*

<sup>a</sup> Department of Physics (ECS), Technical University of Munich, James-Franck-Straße 1,  
85748 Garching, Germany

<sup>b</sup> E-Conversion, Schellingstraße 4, 80799 Munich, Germany

<sup>c</sup> Max Planck-EPFL Laboratory for Molecular Nanoscience and Technology,  
Ecole Polytechnique Fédérale de Lausanne (EPFL), 1015 Lausanne, Switzerland

<sup>d</sup> Institute of Physics (IPHYS), Ecole Polytechnique Fédérale de Lausanne (EPFL),  
1015 Lausanne, Switzerland.

#### Contact Information

Xaver Lamprecht: [xaver.lamprecht@tum.de](mailto:xaver.lamprecht@tum.de)

Philipp Marzak: [philipp.marzak@ph.tum.de](mailto:philipp.marzak@ph.tum.de)

# Supporting Information

Alexander Wieczorek: [alexander.wieczorek@tum.de](mailto:alexander.wieczorek@tum.de)

Nina Thomsen: [nina.thomsen@tum.de](mailto:nina.thomsen@tum.de)

Jongho Kim: [jongho.kim@tum.de](mailto:jongho.kim@tum.de)

Batyr Garlyyev: [batyr.garlyyev@tum.de](mailto:batyr.garlyyev@tum.de)

Yunchang Liang: [yunchang.liang@epfl.ch](mailto:yunchang.liang@epfl.ch)

\* Corresponding Authors

E-Mails: [jeongsik.yun@rist.re.kr](mailto:jeongsik.yun@rist.re.kr) (J. Yun), [bandarenka@ph.tum.de](mailto:bandarenka@ph.tum.de) (A. S. Bandarenka). Tel.:

+49 (0) 89 289 12531

# Supporting Information

## Experimental

### Electrodeposited NaIn[Fe(CN)<sub>6</sub>] films with high mass loading:

The electrochemical deposition of NaIn[Fe(CN)<sub>6</sub>] thin film on a circular piece ( $\Phi=12$  mm) of conductive carbon cloth was performed similar to the method for Au quartz crystals in an electrochemical glass cell in three-electrode configuration under inert argon atmosphere. In short, the substrate was submerged in an aqueous solution containing 2 mM K<sub>3</sub>[Fe(CN)<sub>6</sub>] (99%, Sigma-Aldrich), 2 mM In(III)Cl<sub>3</sub> ( $\geq 99.9\%$ , Carl Roth) and 0.25 M Na<sub>2</sub>SO<sub>4</sub> ( $\geq 99\%$ , Sigma-Aldrich). The deposition was performed by means of cyclic voltammetry with a scan rate of 50 mV/s in two different potential ranges (see **Figure S1**; first 50 cycles: 0.4 – 1.05 V *vs* SSC; followed by 50 cycles: 0.4 – 1.15 V *vs* SSC). After the synthesis, the sample was dried in the cell for 1 hour in argon atmosphere. The performance of the InHCF electrode, as shown in **Figure S1B**, was investigated by galvanostatic cycling in 8 M NaClO<sub>4</sub> within the potential range from 0.4 V to 1.5 V *vs* SSC.

An approximate mass loading of 483  $\mu\text{g cm}^{-2}$  was calculated for the electrode using its measured maximum capacity (28  $\mu\text{Ah cm}^{-2}$ , see **Figure S1B**) and the experimentally determined specific capacity for InHCF of 58 mAh g<sup>-1</sup>.

## Supporting Information

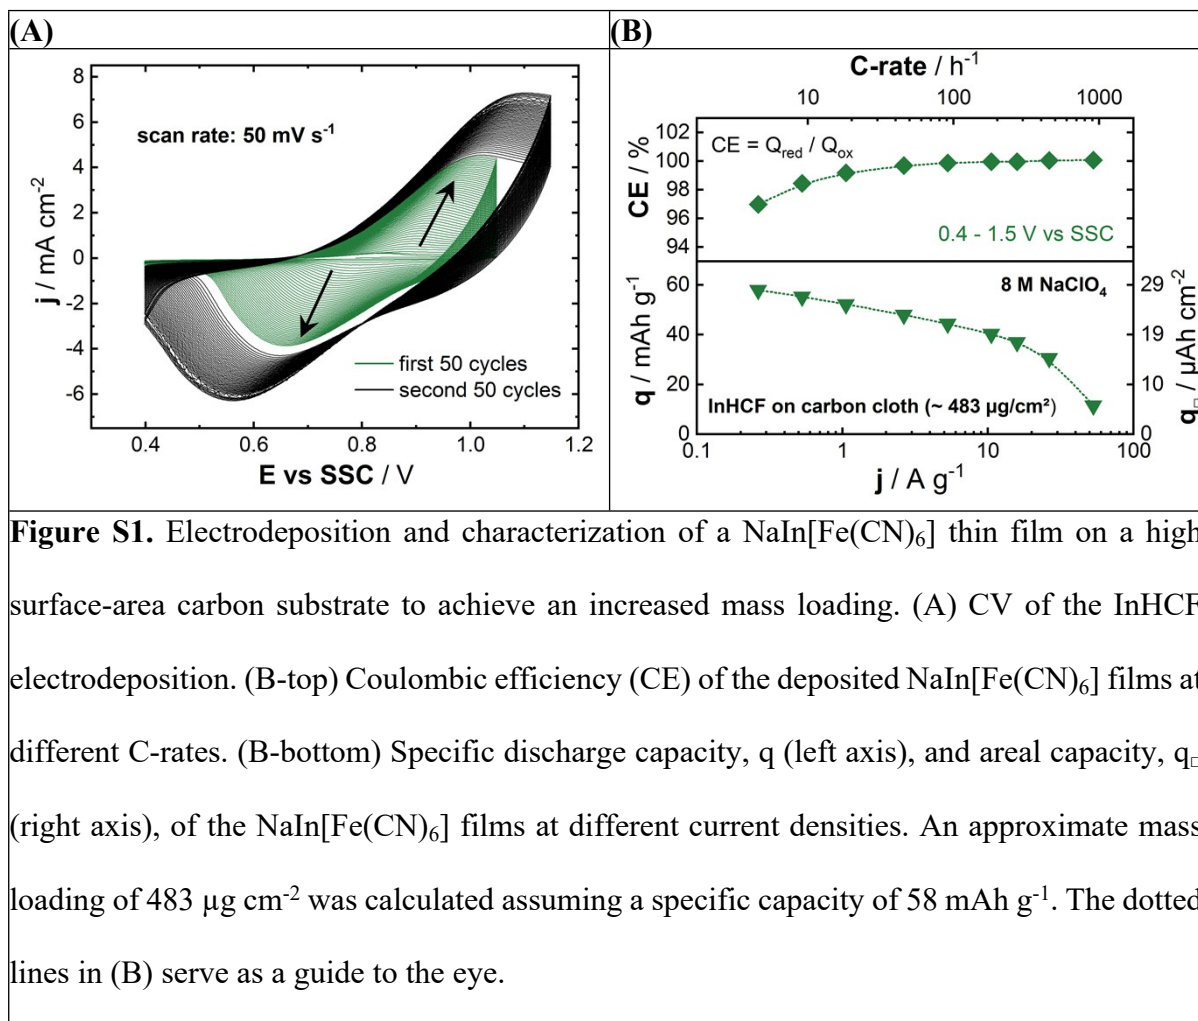

**Figure S1.** Electrodeposition and characterization of a NaIn[Fe(CN)<sub>6</sub>] thin film on a high surface-area carbon substrate to achieve an increased mass loading. (A) CV of the InHCF electrodeposition. (B-top) Coulombic efficiency (CE) of the deposited NaIn[Fe(CN)<sub>6</sub>] films at different C-rates. (B-bottom) Specific discharge capacity,  $q$  (left axis), and areal capacity,  $q_{\square}$  (right axis), of the NaIn[Fe(CN)<sub>6</sub>] films at different current densities. An approximate mass loading of 483 μg cm<sup>-2</sup> was calculated assuming a specific capacity of 58 mAh g<sup>-1</sup>. The dotted lines in (B) serve as a guide to the eye.
